# Supplementary material for: Early involvement of peripherally derived monocytes in inflammation in an NMO-like mouse model
Source: Springer Nature journal article supplement (doi:10.1038/s41598-024-51759-4), 2024-01-12
Supplement: 41598_2024_51759_MOESM1_ESM.pdf [file 41598_2024_51759_MOESM1_ESM.pdf]

**Figure S1**

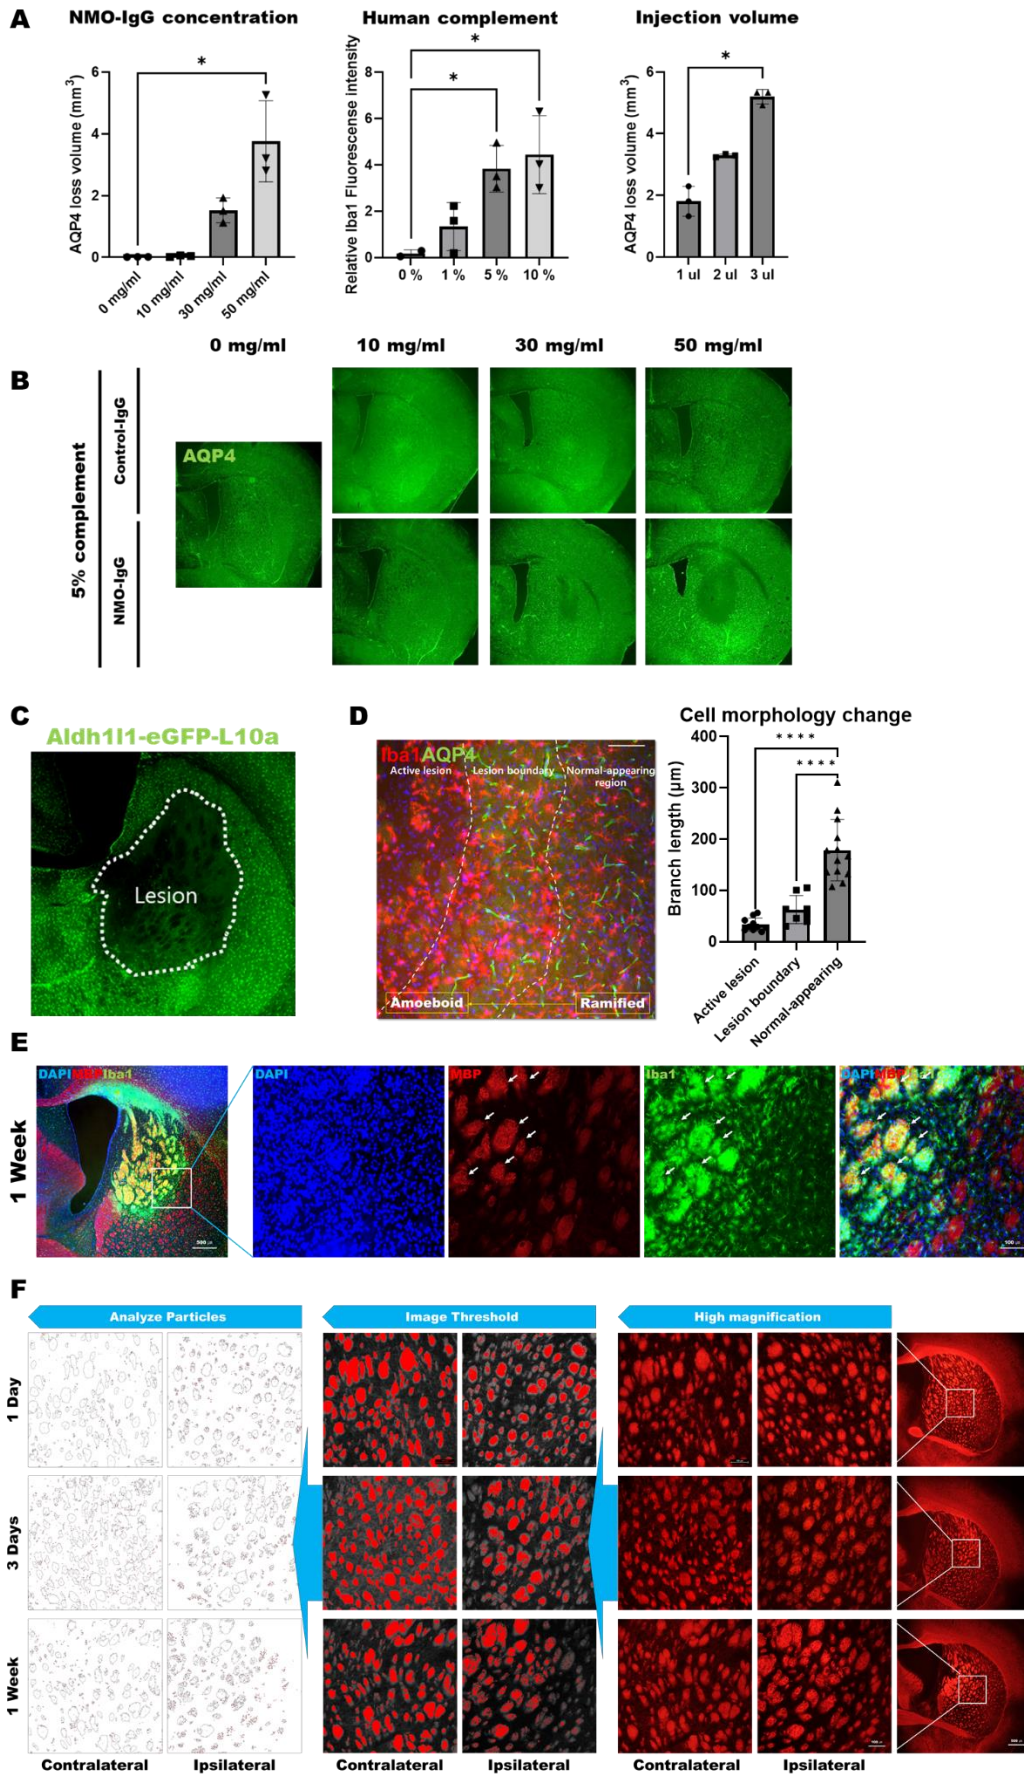

**Fig. S1.** The optimization of NMO-IgG mixture. (A) Measurement of NMO-IgG concentration, inflammatory induction by human complement and determination of injection volume (Kruskal-Wallis test with Dunn's post-hoc,  $*p < 0.05$ ). (B) Measurement of AQP4 loss volume using various combinations of NMO-IgG and hC. (C) Induction of astrocyte depletion using a mixture of 50 mg NMO-IgG and 5% hC in Aldh1L1-eGFP-L10a TG mice. (D) Analysis of Iba1+ cell morphology based on the lesion location using Iba1+AQP4 immunostain. (E) High magnification images of the MBP and Iba1 stain. (F) Measurement process of axon bundle size.

**Figure S2**

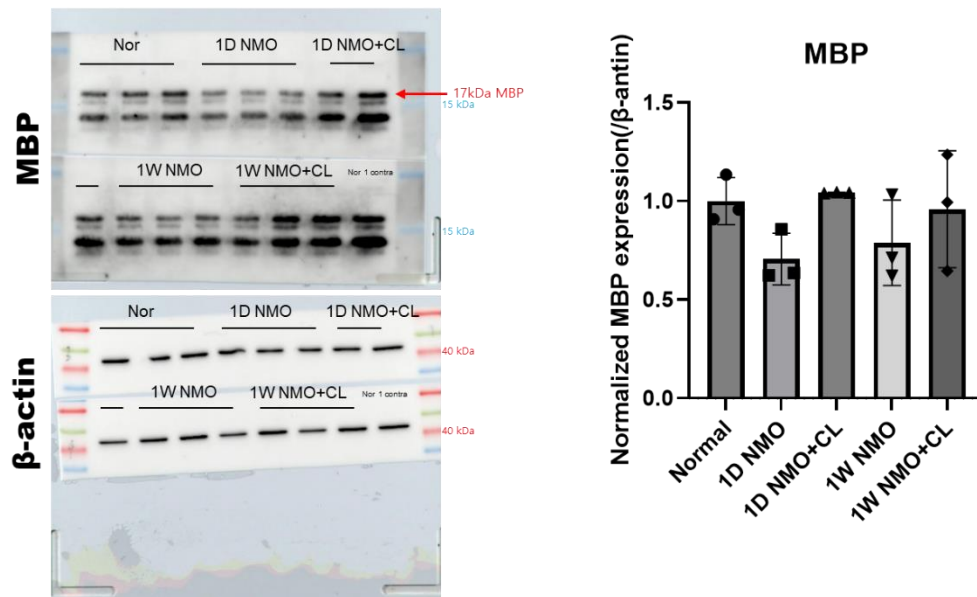

**Fig. S2.** After 1 day and 7 days post-injury, brain lysates from the Normal, NMO, and NMO+CL groups were subjected to SDS-PAGE to detect MBP and  $\beta$ -actin. The molecular sizes of 15 kDa and 40 kDa were indicated by blue and red color, while the 17 kDa MBPs were indicated by red arrows. Original blots/membranes of MBP and  $\beta$ -actin were obtained from different parts of the same gel.

**Figure S3**

**A**

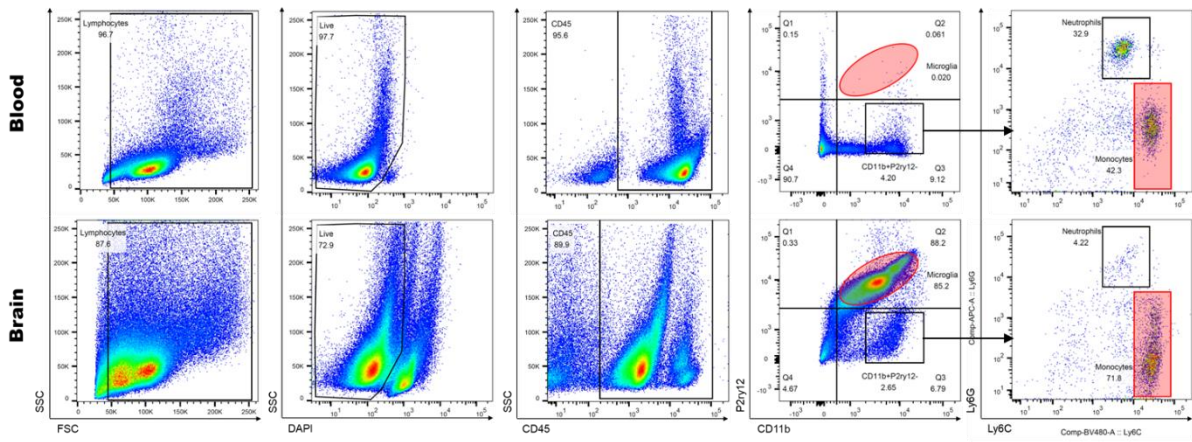

**B**

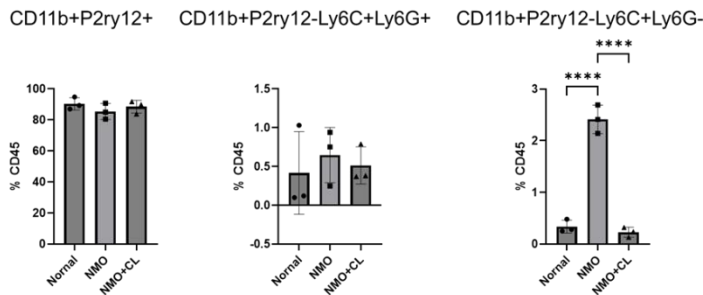

**Fig. S3.** Sorting of monocytes and microglia for RNA-seq analysis. (A) Immune cells were isolated from the blood and brain tissue of the Normal, NMO, and NMO+CL groups at 1 day post-injury. Monocytes and microglia were sorted based on Live/CD45+ cells, followed by gating of CD11b/P2ry12 cells and further gating of Ly6C/Ly6G cell populations from CD11b+P2ry12- cells. The transparent red squares represent sorted CD11b+P2ry12+ microglia and CD11b+P2ry12-Ly6C+Ly6G- monocytes. (B) Bar graph displaying differences in cell numbers for each cell type. (Kruskal-Wallis test with Dunn's post-hoc, \*\*\*\* $p < 0.0001$ , three independent replicates from 3-4 samples).

## Figure S4

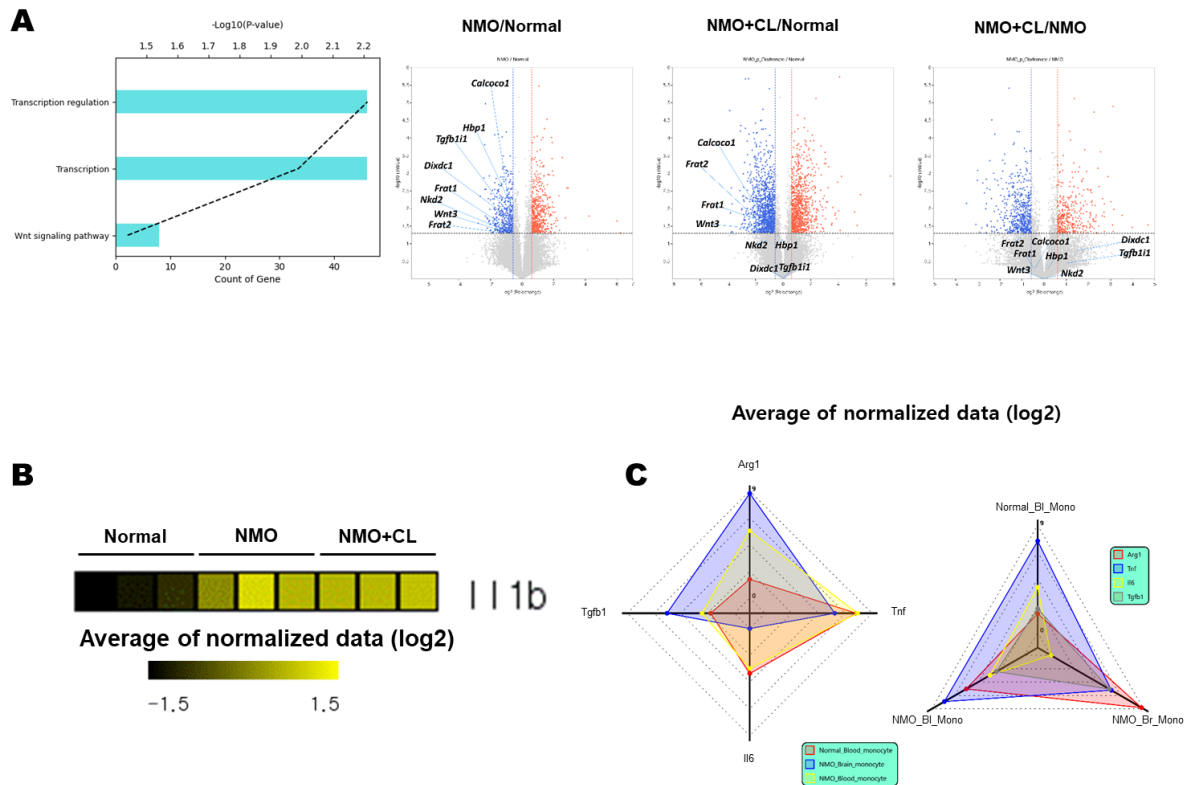

**Fig. S4.** Volcano plots of differential gene expression profiles showing the magnitude on the x-axis (Log<sub>2</sub> fold change) and significance on the y-axis (-Log<sub>10</sub> adjusted p value) for NMO vs. Normal, NMO+CL vs. Normal and NMO+CL vs. NMO. Wnt signaling-related genes are highlighted. (B) Heatmap of *Ill1b* expression shows no change with clodronate treatment. (C) Pro- and Anti-inflammatory signature genes in monocyte RNA-seq.

**Table 1 Groups, analysis, and sample number in animal experiments**

| Experiments                    | Analysis                       | Groups         | Sample Number    |        |                  |
|--------------------------------|--------------------------------|----------------|------------------|--------|------------------|
|                                |                                |                | 1 day            | 3 days | 1 week           |
| Pathophysiology of NMO model   | Immunofluorescence             | Normal         | 3                | 3      | 3                |
|                                |                                | Control-IgG+hC | 3                | 3      | 3                |
|                                |                                | NMO-IgG+hC     | 3                | 3      | 3                |
|                                | PCR                            | Normal         | 3                | 3      | 3                |
|                                |                                | Control-IgG+hC | 3                | 3      | 3                |
|                                |                                | NMO-IgG+hC     | 3                | 3      | 3                |
|                                | Flow cytometry                 | Normal         | 6                |        |                  |
|                                |                                | Control-IgG+hC | 6                |        |                  |
|                                |                                | NMO-IgG+hC     | 6                |        |                  |
| Monocyte/macrophages depletion | Flow cytometry                 | Normal         | 6                |        |                  |
|                                |                                | NMO            | 6                |        |                  |
|                                |                                | NMO+CL         | 5                |        |                  |
|                                | PCR                            | Normal         | 3                |        |                  |
|                                |                                | NMO            | 3                |        |                  |
|                                |                                | NMO+CL         | 3                |        |                  |
|                                | Immunofluorescence & LFB stain | Normal         | 5                |        | 5                |
|                                |                                | NMO            | 5                |        | 5                |
|                                |                                | NMO+CL         | 3                |        | 3                |
|                                | Western blotting               | Normal         | 3×3 <sup>†</sup> |        | 3×3 <sup>†</sup> |
|                                |                                | NMO            | 3×3 <sup>†</sup> |        | 3×3 <sup>†</sup> |
|                                |                                | NMO+CL         | 3×3 <sup>†</sup> |        | 3×3 <sup>†</sup> |
| RNAseq of Monocytes            | FACS                           | Normal         | 5×3 <sup>†</sup> |        |                  |
|                                |                                | NMO            | 5×3 <sup>†</sup> |        |                  |
| RNAseq of Microglia            | FACS                           | Normal         | 3×3 <sup>†</sup> |        |                  |
|                                |                                | NMO            | 3×3 <sup>†</sup> |        |                  |
|                                |                                | NMO+CL         | 3×3 <sup>†</sup> |        |                  |

<sup>†</sup>Each pooled samples × Number of independent experimental replicates
